# Supplementary material for: Sampling Variation of RAD-Seq Data from Diploid and Tetraploid Potato (Solanum tuberosum L.)
Source: PubMed Central journal article supplement (PMC7915145; doi:10.3390/plants10020319), 2021-02-07
Supplement: plants-10-00319-s001.pdf [file plants-10-00319-s001.pdf]

**Supplementary Table S1** A complete list of all Illumina adapters used in the optimized RAD-seq study.

a) Sample-specific adapters for EcoRI cut site ligation

| Adapters    | Nucleotide sequences                              |
|-------------|---------------------------------------------------|
| EcoRI_P1.1  | ACACTCTTCCCTACACGACGCTCTCCGATCTACTGG              |
| EcoRI_P1.2  | ACACTCTTCCCTACACGACGCTCTCCGATCTAGCTA              |
| EcoRI_P1.3  | ACACTCTTCCCTACACGACGCTCTCCGATCTATACG              |
| EcoRI_P1.4  | ACACTCTTCCCTACACGACGCTCTCCGATCTCGATC              |
| EcoRI_P1.5  | ACACTCTTCCCTACACGACGCTCTCCGATCTCGTAC              |
| EcoRI_P1.6  | ACACTCTTCCCTACACGACGCTCTCCGATCTCTGAT              |
| EcoRI_P1.7  | ACACTCTTCCCTACACGACGCTCTCCGATCTGAGTC              |
| EcoRI_P1.8  | ACACTCTTCCCTACACGACGCTCTCCGATCTGCTGA              |
| EcoRI_P1.9  | ACACTCTTCCCTACACGACGCTCTCCGATCTGTCGA              |
| EcoRI_P1.10 | ACACTCTTCCCTACACGACGCTCTCCGATCTTACCG              |
| EcoRI_P1.11 | ACACTCTTCCCTACACGACGCTCTCCGATCTGCATG              |
| EcoRI_P1.12 | ACACTCTTCCCTACACGACGCTCTCCGATCTTCAGT              |
| EcoRI_P2.1  | [Phos]AATTCCAGTAGATCGGAAGAGCGTCGTGTAGGGAAAGAGTGT  |
| EcoRI_P2.2  | [Phos]AATTAGCTAGATCGGAAGAGCGTCGTGTAGGGAAAGAGTGT   |
| EcoRI_P2.3  | [Phos]AATTCGTATAGATCGGAAGAGCGTCGTGTAGGGAAAGAGTGT  |
| EcoRI_P2.4  | [Phos]AATTGATCGAGATCGGAAGAGCGTCGTGTAGGGAAAGAGTGT  |
| EcoRI_P2.5  | [Phos]AATTGTACGAGATCGGAAGAGCGTCGTGTAGGGAAAGAGTGT  |
| EcoRI_P2.6  | [Phos]AATTATCAGAGATCGGAAGAGCGTCGTGTAGGGAAAGAGTGT  |
| EcoRI_P2.7  | [Phos]AATTGACTCAGATCGGAAGAGCGTCGTGTAGGGAAAGAGTGT  |
| EcoRI_P2.8  | [Phos]AATTCAGCAGATCGGAAGAGCGTCGTGTAGGGAAAGAGTGT   |
| EcoRI_P2.9  | [Phos]AATTCGACAGATCGGAAGAGCGTCGTGTAGGGAAAGAGTGT   |
| EcoRI_P2.10 | [Phos]AATTCGGTAAAGATCGGAAGAGCGTCGTGTAGGGAAAGAGTGT |
| EcoRI_P2.11 | [Phos]AATTCATGCAGATCGGAAGAGCGTCGTGTAGGGAAAGAGTGT  |
| EcoRI_P2.12 | [Phos]AATTACTGAAGATCGGAAGAGCGTCGTGTAGGGAAAGAGTGT  |

The unique 5bp barcodes are highlighted in yellow.

b) Universal adapters for MspI cut site ligation

---

| <b>Adapters</b> | <b>Nucleotide sequence</b>                 |
|-----------------|--------------------------------------------|
| MspI_P1         | [Biotin]GTGACTGGAGTTCAGACGTGTGCTCTTCCGATCT |
| MspI_P2         | [Phos]CGAGATCGGAAGAGCGAGAACAA              |

---
